# Supplementary material for: Self-assembly of secondary aryl amides in cocrystals with perfluoroaryl coformers: structural analysis and synthon preferences
Source: Royal Society of Chemistry journal article supplement (doi:10.1039/d2ce01710e), 2023-01-01
Supplement: d2ce01710e1.pdf [file d2ce01710e1.pdf]

## Electronic Supplementary Information

### Self-Assembly of Secondary Aryl Amides in Cocrystals with Perfluoroaryl Coformers: Structural Analysis and Synthons Preferences

Jan Alfuth,<sup>a</sup> Katarzyna Kazimierczuk,<sup>b</sup> Tadeusz Połński<sup>a</sup> and Teresa Olszewska<sup>\*a</sup>

<sup>a</sup> Department of Organic Chemistry, Gdańsk University of Technology, 80-233 Gdańsk, Poland

<sup>b</sup> Department of Inorganic Chemistry, Gdańsk University of Technology, 80-233 Gdańsk, Poland

\* Corresponding author: phone: +48 58 347 14 25; e-mail: [teresa.olszewska@pg.edu.pl](mailto:teresa.olszewska@pg.edu.pl)

## Characteristics of cocrystals

|                          |                                                                                     |                                                                                                                                                                  |
|--------------------------|-------------------------------------------------------------------------------------|------------------------------------------------------------------------------------------------------------------------------------------------------------------|
| <b>1·pfba</b>            | 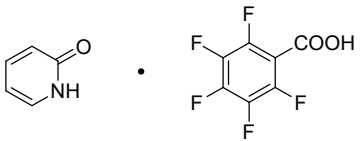   | colourless needles, mp 116–117°C                                                                                                                                 |
| <b>2·pfba</b>            |    | yellow needles, mp 139–141°C                                                                                                                                     |
| <b>3·pfba</b>            |    | pale yellow needles, mp 145°C (decomp.)                                                                                                                          |
| <b>1·pfp</b>             |    | colourless plates, mp 107–109°C                                                                                                                                  |
| <b>2·pfp</b>             |   | yellow needles, mp 128–130°C                                                                                                                                     |
| <b>3<sub>2</sub>·pfp</b> |  | light yellow plates, mp ~250°C (decomp.)<br>(during the measurement pentafluorophenol distils out of the crystals and deposits at the end of the measuring tube) |

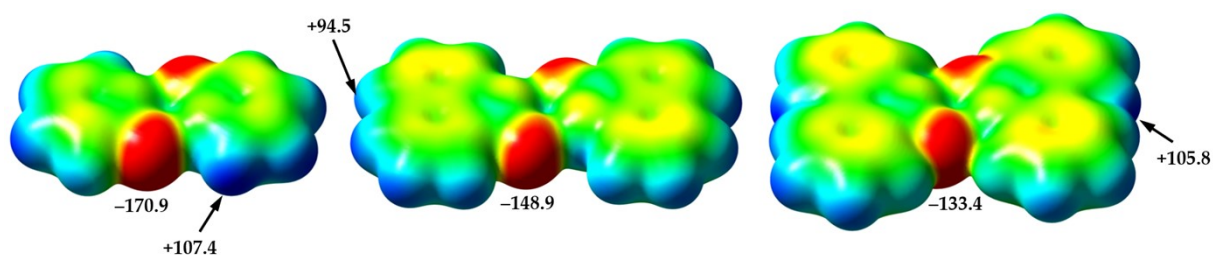

**Fig. S1.** Molecular electrostatic potential maps of dimers of lactams 1–3 (left to right) mapped on 0.002 au electron density isosurface. The colour scale corresponds to values ranging from  $-0.04$  (red) to  $+0.04$  au (blue). The most negative and positive electrostatic potential values (in kJ/mol) are indicated.
